# Supplementary material
Source: PubMed Central journal article supplement (PMC6120193)
Supplement: supp_RA118.004324_138641_1_supp_161361_pb2r4h.pdf [file supp_RA118.004324_138641_1_supp_161361_pb2r4h.pdf]

## **Supplementary information**

### **Template-primer binding affinity and RNase H cleavage specificity contribute to the strand transfer efficiency of HIV-1 reverse transcriptase**

Joanna Luczkowiak, Tania Matamoros and Luis Menéndez-Arias

Centro de Biología Molecular “Severo Ochoa” (Consejo Superior de Investigaciones Científicas & Universidad Autónoma de Madrid), c/Nicolás Cabrera, 1, Campus de Cantoblanco, 28049 Madrid, Spain

**Supplementary Table S1. Rates of nontemplated nucleotide addition of HIV-1 RTs using blunt-ended DNA/DNA substrates.**

| dNTPs          | $k_{\text{obs}}$ (min <sup>-1</sup> ) |                                  |                                  |
|----------------|---------------------------------------|----------------------------------|----------------------------------|
|                | WT BH10                               | 3M_T355A/Q357M                   | 3M_V148I                         |
| <b>A</b>       | 0.313 ± 0.012                         | 0.601 ± 0.034                    | (1.98 ± 0.02) x 10 <sup>-2</sup> |
| <b>G</b>       | (2.03 ± 0.16) x 10 <sup>-2</sup>      | (3.53 ± 0.52) x 10 <sup>-2</sup> | (4.70 ± 0.04) x 10 <sup>-3</sup> |
| <b>C</b>       | (4.60 ± 0.15) x 10 <sup>-3</sup>      | (2.76 ± 0.38) x 10 <sup>-2</sup> | (5.10 ± 0.11) x 10 <sup>-3</sup> |
| <b>T</b>       | (4.20 ± 0.05) x 10 <sup>-3</sup>      | (7.80 ± 0.37) x 10 <sup>-3</sup> | (2.40 ± 0.07) x 10 <sup>-3</sup> |
| <b>A+G</b>     | 0.217 ± 0.008                         | 0.419 ± 0.017                    | (1.53 ± 0.03) x 10 <sup>-2</sup> |
| <b>A+C</b>     | 0.222 ± 0.004                         | 0.478 ± 0.027                    | (1.85 ± 0.03) x 10 <sup>-2</sup> |
| <b>A+T</b>     | 0.358 ± 0.020                         | 0.816 ± 0.050                    | (2.35 ± 0.03) x 10 <sup>-2</sup> |
| <b>G+C</b>     | 0.173 ± 0.009                         | 0.329 ± 0.021                    | (1.12 ± 0.05) x 10 <sup>-2</sup> |
| <b>G+T</b>     | (2.51 ± 0.03) x 10 <sup>-2</sup>      | (3.47 ± 0.17) x 10 <sup>-2</sup> | (6.40 ± 0.21) x 10 <sup>-3</sup> |
| <b>C+T</b>     | (9.60 ± 0.44) x 10 <sup>-3</sup>      | (4.48 ± 0.36) x 10 <sup>-2</sup> | (4.70 ± 0.43) x 10 <sup>-3</sup> |
| <b>A+G+C</b>   | 0.227 ± 0.009                         | 0.492 ± 0.019                    | (1.47 ± 0.03) x 10 <sup>-2</sup> |
| <b>A+G+T</b>   | 0.269 ± 0.012                         | 0.496 ± 0.026                    | (1.66 ± 0.03) x 10 <sup>-2</sup> |
| <b>A+C+T</b>   | 0.247 ± 0.013                         | 0.595 ± 0.039                    | (1.88 ± 0.04) x 10 <sup>-2</sup> |
| <b>G+C+T</b>   | 0.120 ± 0.003                         | 0.195 ± 0.015                    | (9.30 ± 0.57) x 10 <sup>-3</sup> |
| <b>A+G+C+T</b> | 0.225 ± 0.007                         | 0.442 ± 0.024                    | (1.35 ± 0.02) x 10 <sup>-2</sup> |

Reactions were carried out at 37°C with DNA/DNA hybrid D28B/25B (30 nM), using an RT concentration of 60 nM. Each dNTP was supplied at 500 μM each. Reported incorporation rates ( $k_{\text{off}}$ ) represent the average ± SD, of at least three independent experiments.

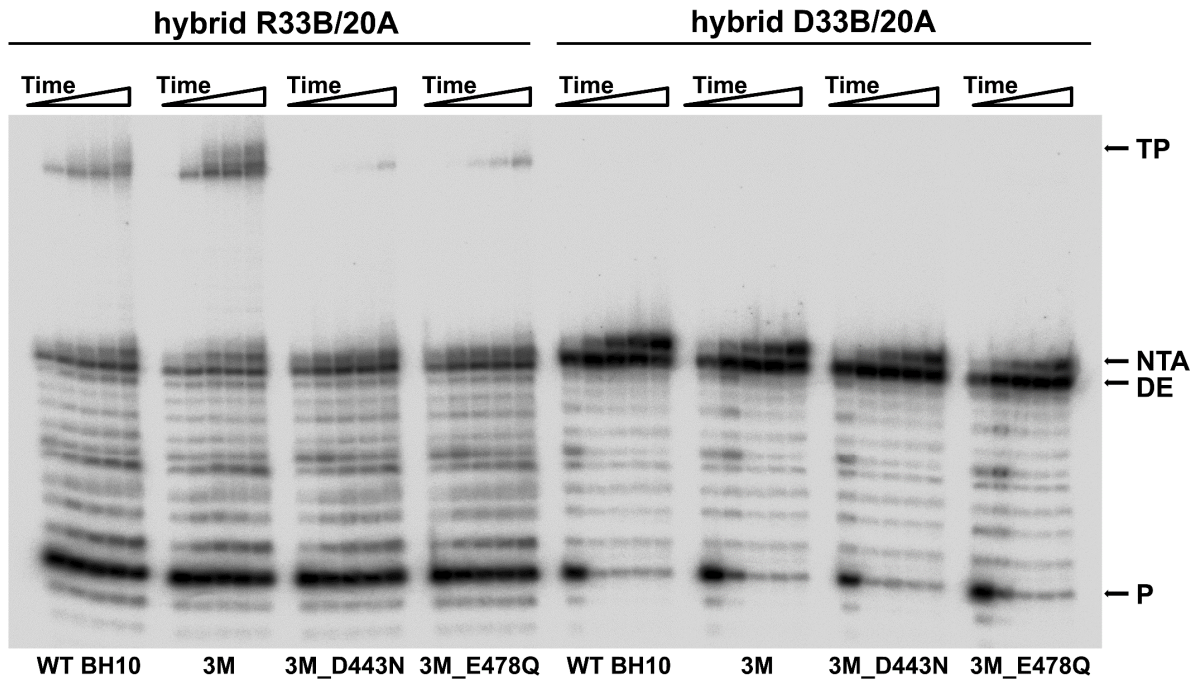

**Supplementary Figure S1. Strand transfer activity of WT and mutant HIV-1 RTs.** Assays were carried out with two different template-primers containing: 1) a 5' <sup>32</sup>P-radiolabeled DNA primer (20A), an RNA donor (R33B), and DNA acceptors containing 3'-end sequences that overlap with the 5' nucleotide sequence of R33B; and 2) a 5' <sup>32</sup>P-radiolabeled DNA primer (20A), an DNA donor (D33B), and DNA acceptors containing 3'-end sequences that overlap with the 5' nucleotide sequence of D33B. Reactions were carried out in the presence of 6-7.5 nM RTs, 30 nM donor-primer (R33B/20A, D33B/20A) and 60 nM acceptor (35D). Aliquots were removed at 1, 5, 15, 30 and 60 min. TP, transfer product; DE, donor extension product; NTA, nontemplated nucleotide addition product, and P, unextended primer.

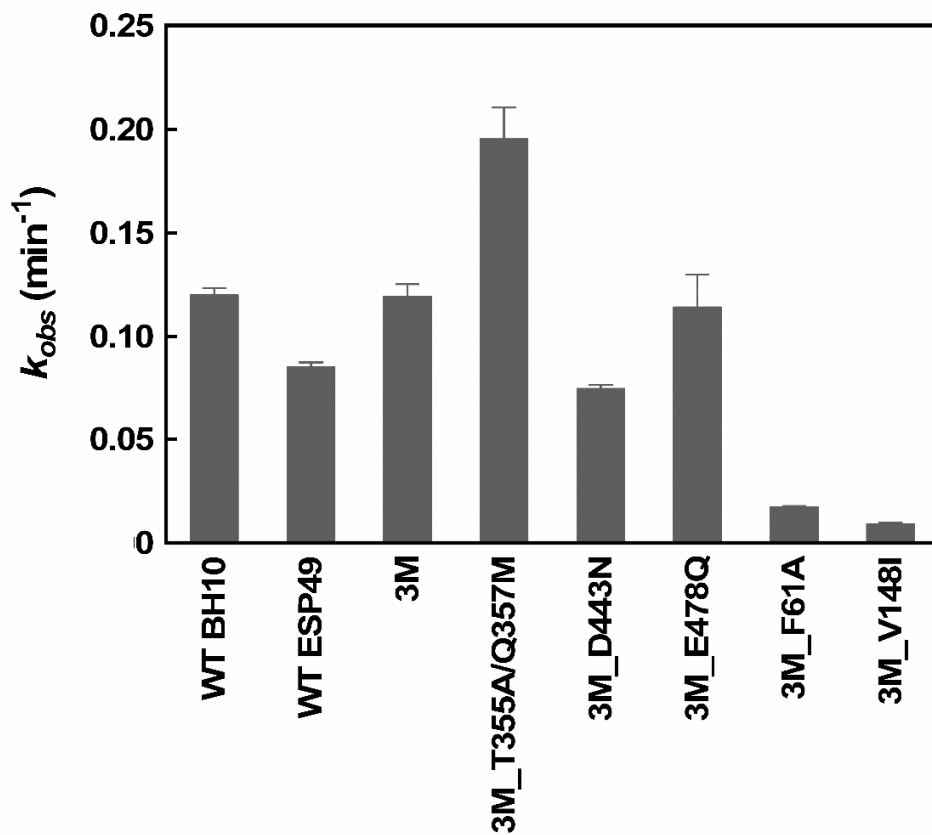

**Supplementary Figure S2. Rates of nontemplated nucleotide addition of HIV-1 RTs using blunt-ended DNA/DNA substrates, in the presence of a mixture of dGTP, dCTP and dTTP.** Reactions were carried out at 37°C with DNA/DNA hybrid D28B/25B (30 nM), using an RT concentration of 60 nM. Each dNTP was supplied at 500  $\mu\text{M}$  each. Reported incorporation rates ( $k_{off}$ ) represent the average  $\pm$  SD, of at least three independent experiments.

**Supplementary Table S2. Nucleotide sequences of mutagenic primers.**

| <b>Amino acid substitutions</b>   | <b>Primers 5' – 3'</b>                                                             |
|-----------------------------------|------------------------------------------------------------------------------------|
| L92P (HIV-1 <sub>BH10</sub> RT)   | 5'-CTTCTGGGAAGTTCAACCAGGAATACCACATCC-3'<br>5'-GGATGTGGTATTCCTGGTTGAACTTCCCAGAAG-3' |
| L92P (HIV-1 <sub>ESP49</sub> RT)  | 5'-TTTTGGGAGGTACAGCCAGGTATCCCACATCCG-3'<br>5'-CGGATGTGGGATACCTGGCTGTACCTCCCAAAA-3' |
| D443N (HIV-1 <sub>ESP49</sub> RT) | 5'-GAAACCTATTATGTAAATGGAGCAGCTA-3'<br>5'-TAGCTGCTCCATTTACATAATAGGTTTC-3'           |
| E478Q (HIV-1 <sub>ESP49</sub> RT) | 5'-CCAATCAAAAAGGCTCAATTAATGGCAG-3'<br>5'-CTGCCATTAATTGAGCCTTTTGATTGG-3'            |
